# Supplementary material for: Zoonotic Visceral Leishmaniasis: New Insights on Innate Immune Response by Blood Macrophages and Liver Kupffer Cells to Leishmania infantum Parasites
Source: MDPI journal article supplement (doi:10.3390/biology11010100), 2022-01-09
Supplement: s1 [file s1]

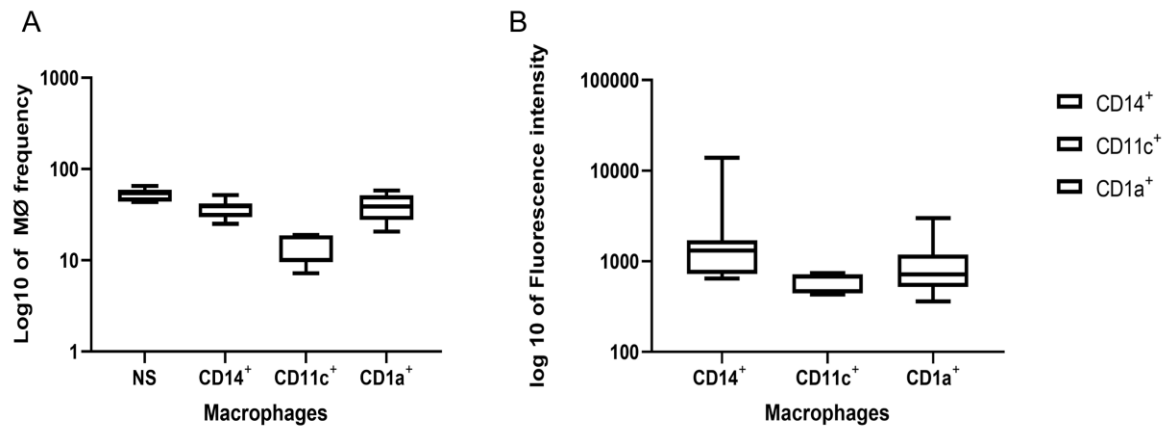

**Figure S1.** Flow cytometry immunophenotype of the isolated cells using universal macrophages markers (CD14, CD11c, CD1a) was performed to ensure that the isolated cells were in fact macrophages.
